# Supplementary material for: Practical Approaches to Apply Ultra-Thick Graphite Anode to High-Energy Lithium-Ion Battery: Carbonization and 3-Dimensionalization
Source: MDPI journal article supplement (doi:10.3390/nano12152625), 2022-07-29
Supplement: s1 [file s1]

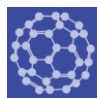

## Article

# Practical Approaches to Apply Ultra-Thick Graphite Anode to High-Energy Lithium-Ion Battery: Carbonization and 3-Dimensionalization

Junsu Park <sup>1,†</sup>, Seokho Suh <sup>2,†</sup>, Sigita Tamulevičius <sup>3</sup>, Daesoo Kim <sup>4</sup>, Dongin Choi <sup>4</sup>, Sungho Jeong <sup>5,\*</sup> and Hyeon-Jin Kim <sup>2,\*</sup>

<sup>1</sup> Ground Technology Research Institute, Agency for Defense Development, Yuseong-gu, P.O. Box 35, Daejeon 34186, Korea; jspark1@add.re.kr

<sup>2</sup> Graduate School of Energy Convergence, Institute of Integrated Technology, Gwangju Institute of Science and Technology, 123 Cheomdangwagi-ro, Buk-gu, Gwangju 61005, Korea; seok2659@gm.gist.ac.kr

<sup>3</sup> Institute of Materials Science of Kaunas University of Technology, Barsausko St. 59, LT-51423 Kaunas, Lithuania; sigita.tamulevicius@ktu.lt

<sup>4</sup> LG Energy Solution, Ltd., 188 Munji-ro, Yuseong-gu, Daejeon 34122, Korea; daesookim@lgensol.com (D.K.); dichoi@lgensol.com (D.C.)

<sup>5</sup> School of Mechanical Engineering, Gwangju Institute of Science and Technology, 123 Cheomdangwagi-ro, Buk-gu, Gwangju 61005, Korea

\* Correspondence: shjeong@gist.ac.kr (S.J.); hjkim@gist.ac.kr (H.-J.K.)

† These authors contributed equally to this work.

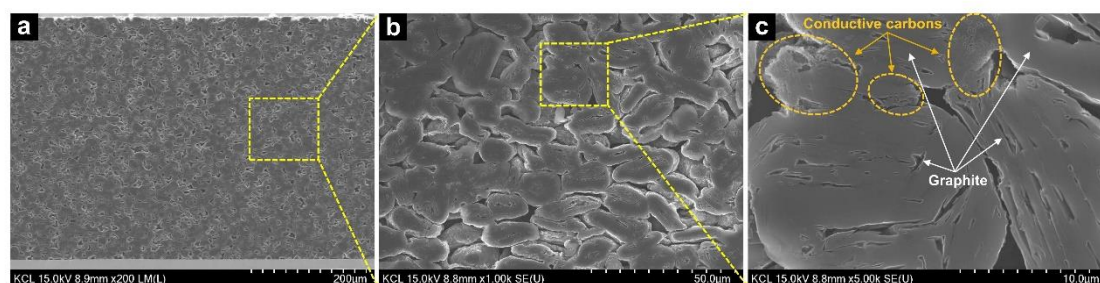

Figure S1. Cross-section SEM images of a typical thick Gr electrode.

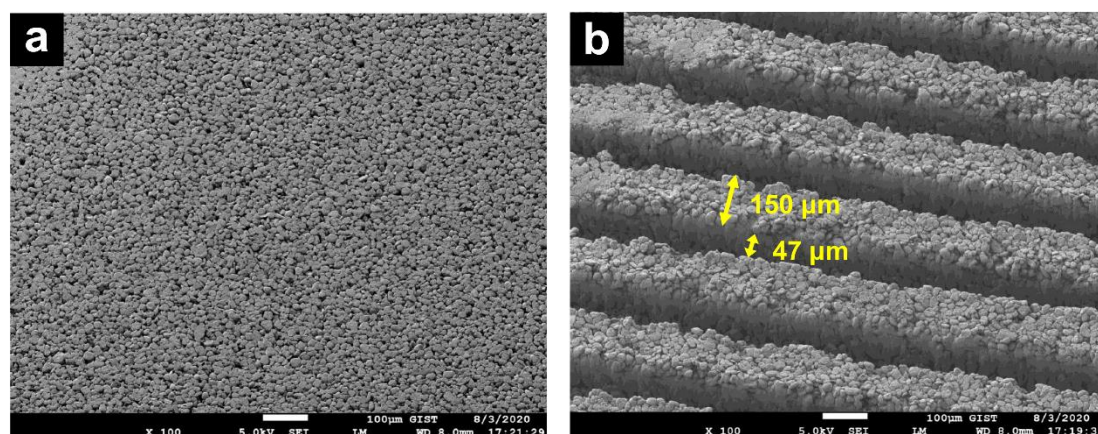

Figure S2. SEM images of an original and a PVDF-C-L electrode.

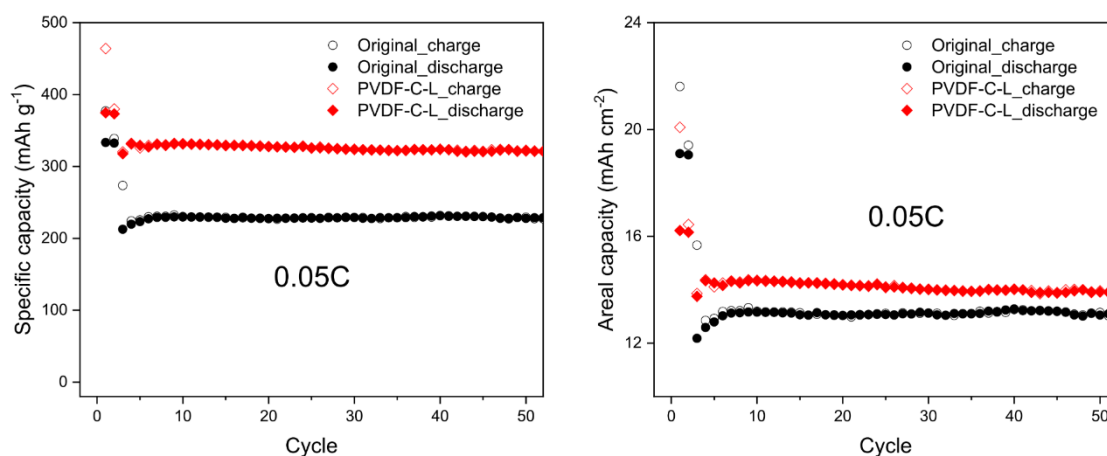

**Figure S3.** Comparison of full cell cycle performances such as (a) specific capacity normalized by mass of active material and (b) areal capacity of graphite anodes.

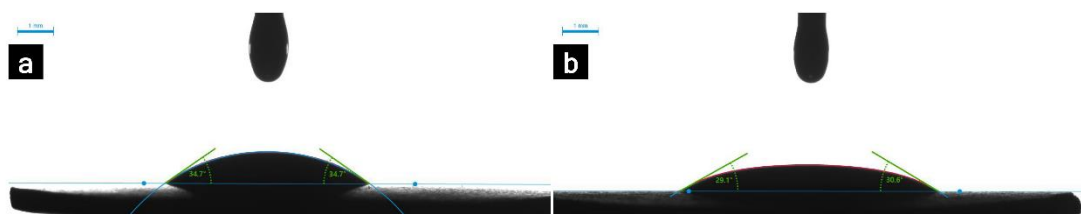

**Figure S4.** Contact angle of an electrolyte drop at the surface of (a) an original and (b) a PVDF-C-L.

**Table S1.** Wetting time of original and carbonized laser-treated electrodes depending on the contact angle.

|          | Wetting time                      |                                             |
|----------|-----------------------------------|---------------------------------------------|
|          | Immediately after drop<br>(s/20°) | After a while (at the same angle)<br>(s/5°) |
| Original | 0.40 s (34.75° → 14.70°)          | 2.90 s (10.78° → 5.67°)                     |
| PVDF-C-L | 0.25 s (28.92° → 8.95°)           | 0.20 s (10.70° → 5.71°)                     |
